# Supplementary material for: Fully deprotected β-(1→2)-mannotetraose forms a contorted α-helix in solution: convergent synthesis and conformational characterization by NMR and DFT
Source: Royal Society of Chemistry journal article supplement (doi:10.1039/b9nj00702d), 2010-01-01
Supplement: b9nj00702d.pdf [file b9nj00702d.pdf]

**Fully Deprotected  $\beta$ -(1 $\rightarrow$ 2)-Mannotetraose Forms a Contorted  $\alpha$ -Helix  
in Solution: Convergent Synthesis and Conformational  
Characterization by NMR and DFT**

Filip S. Ekholm, Jari Sinkkonen and Reko Leino\*

**Table of Contents:**

|                                                                       |         |
|-----------------------------------------------------------------------|---------|
| $^1\text{H}$ spectrum of compound <b>3</b> in $\text{CDCl}_3$         | .....S2 |
| $^{13}\text{C}$ spectrum of compound <b>3</b> in $\text{CDCl}_3$      | .....S2 |
| $^1\text{H}$ spectrum of compound <b>4</b> in MeOD                    | .....S3 |
| $^{13}\text{C}$ spectrum of compound <b>4</b> in MeOD                 | .....S3 |
| 2D-NOESY spectrum of compound <b>4</b> in MeOD                        | .....S4 |
| $^1\text{H}$ spectrum of compound <b>4</b> in $\text{D}_2\text{O}$    | .....S4 |
| $^{13}\text{C}$ spectrum of compound <b>4</b> in $\text{D}_2\text{O}$ | .....S5 |
| 2D-NOESY spectrum of compound <b>4</b> in $\text{D}_2\text{O}$        | .....S5 |
| The B3LYP/6-61G(d,p) optimized structure of <b>4</b>                  | .....S6 |

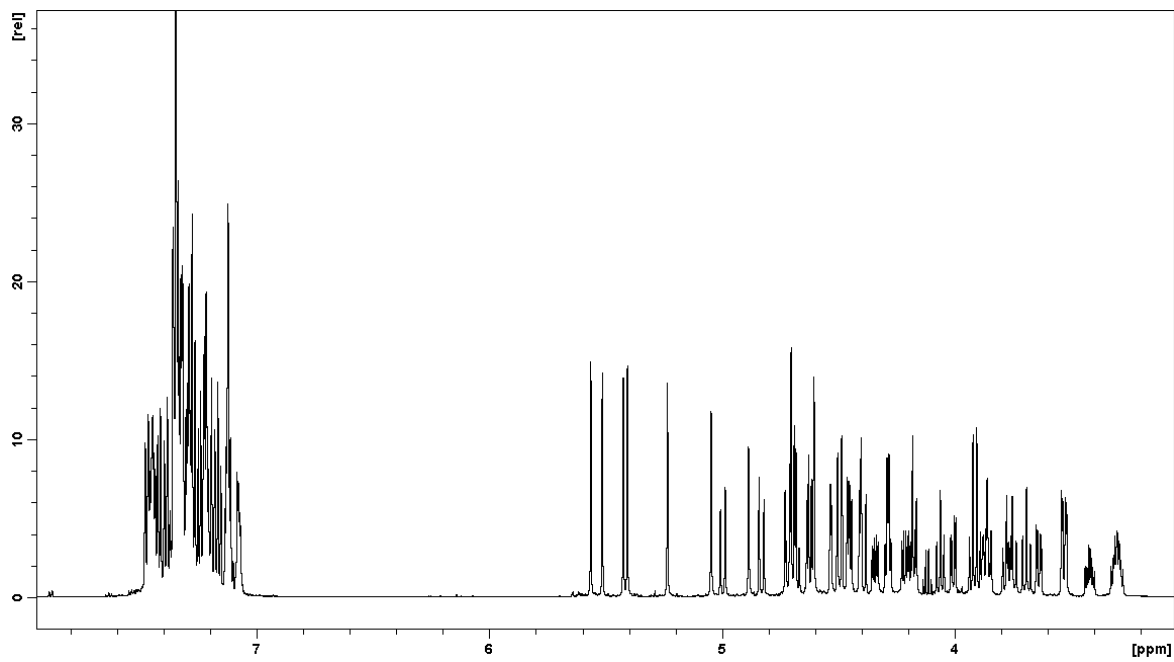

$^1\text{H}$  NMR spectrum of compound **3** in  $\text{CDCl}_3$  recorded at  $25\text{ }^\circ\text{C}$ .

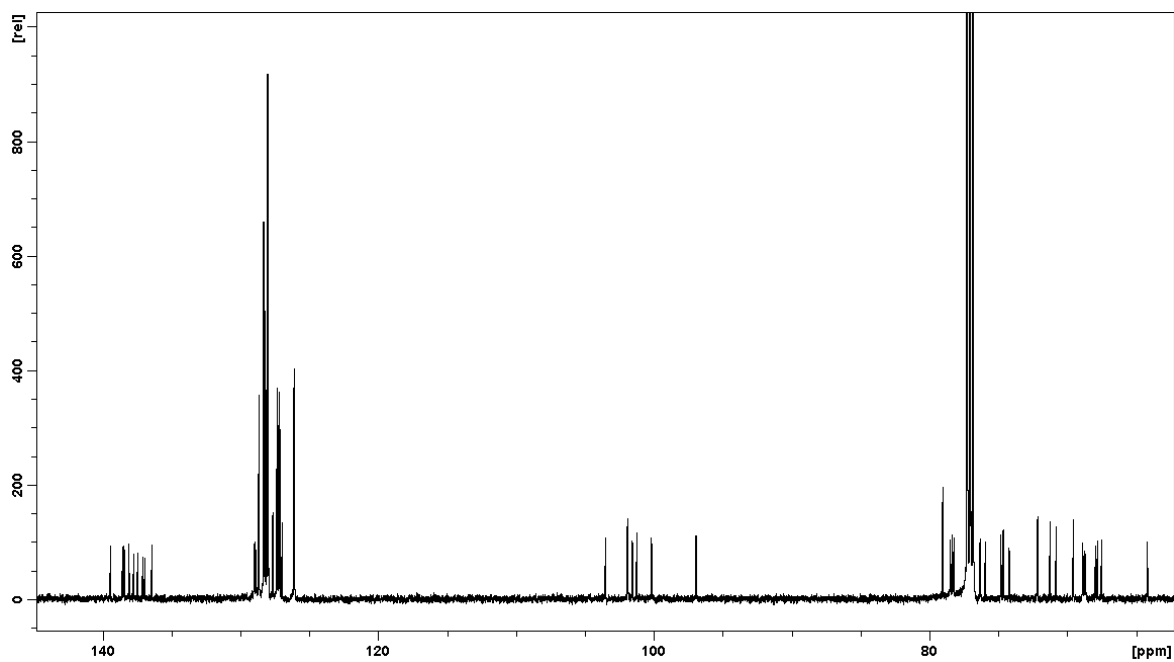

$^{13}\text{C}$  NMR spectrum of compound **3** in  $\text{CDCl}_3$  recorded at  $25\text{ }^\circ\text{C}$ .

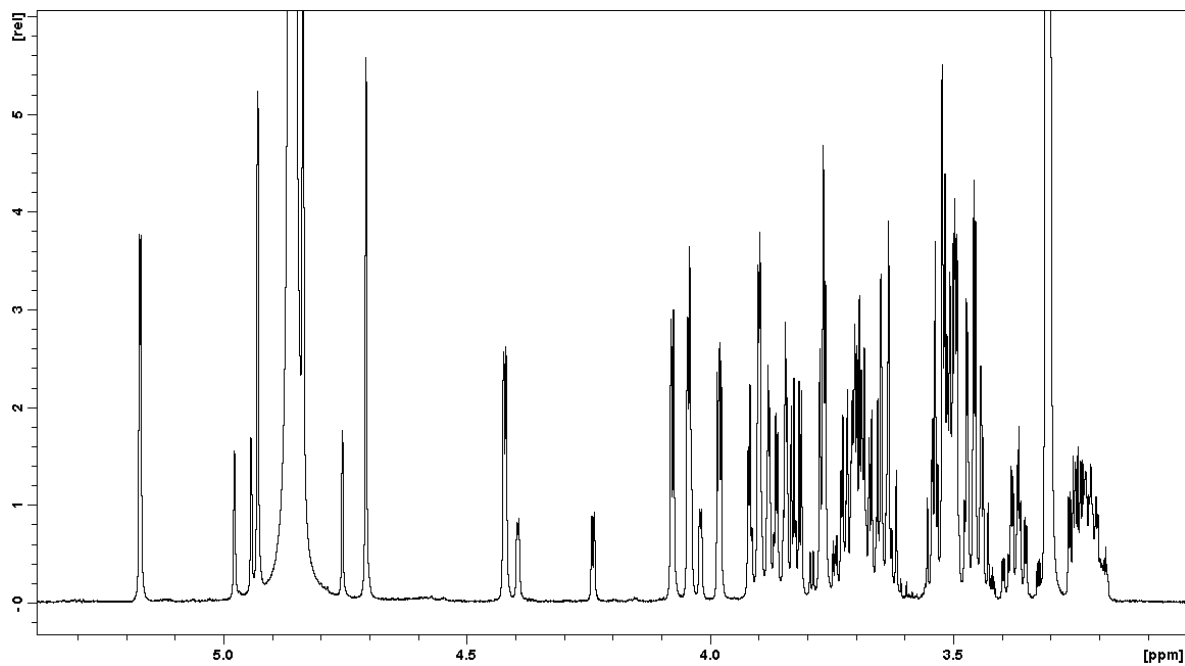

$^1\text{H}$  NMR spectrum of compound 4 in MeOD recorded at 25 °C.

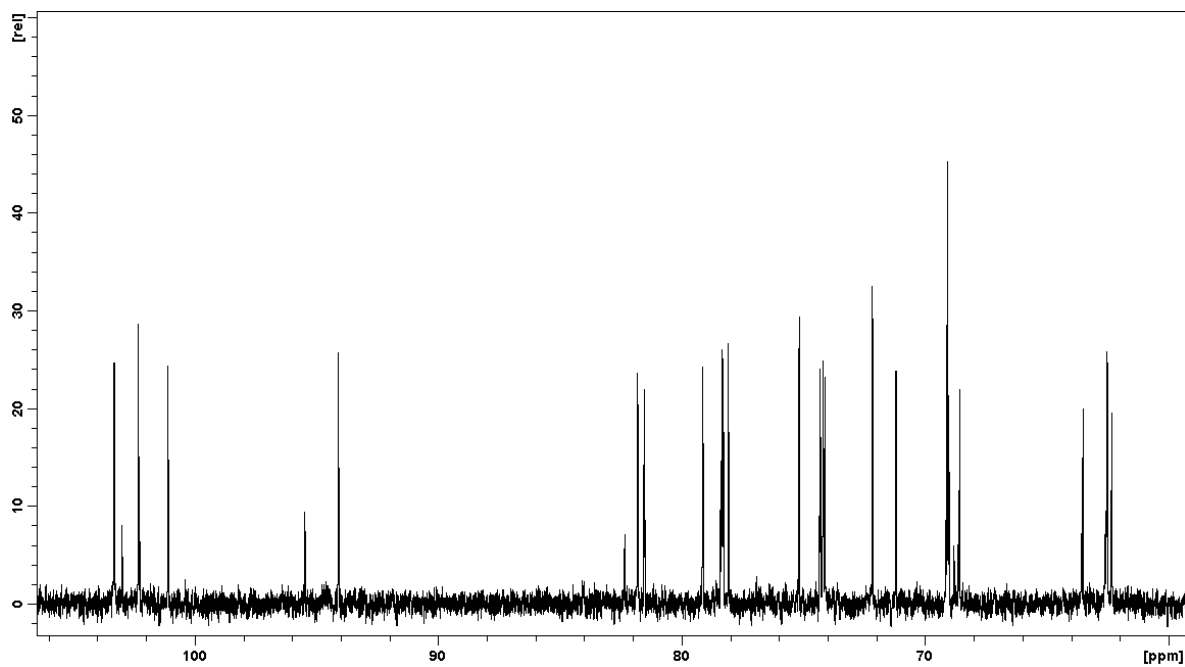

$^{13}\text{C}$  NMR spectrum of compound 4 in MeOD recorded at 25 °C.

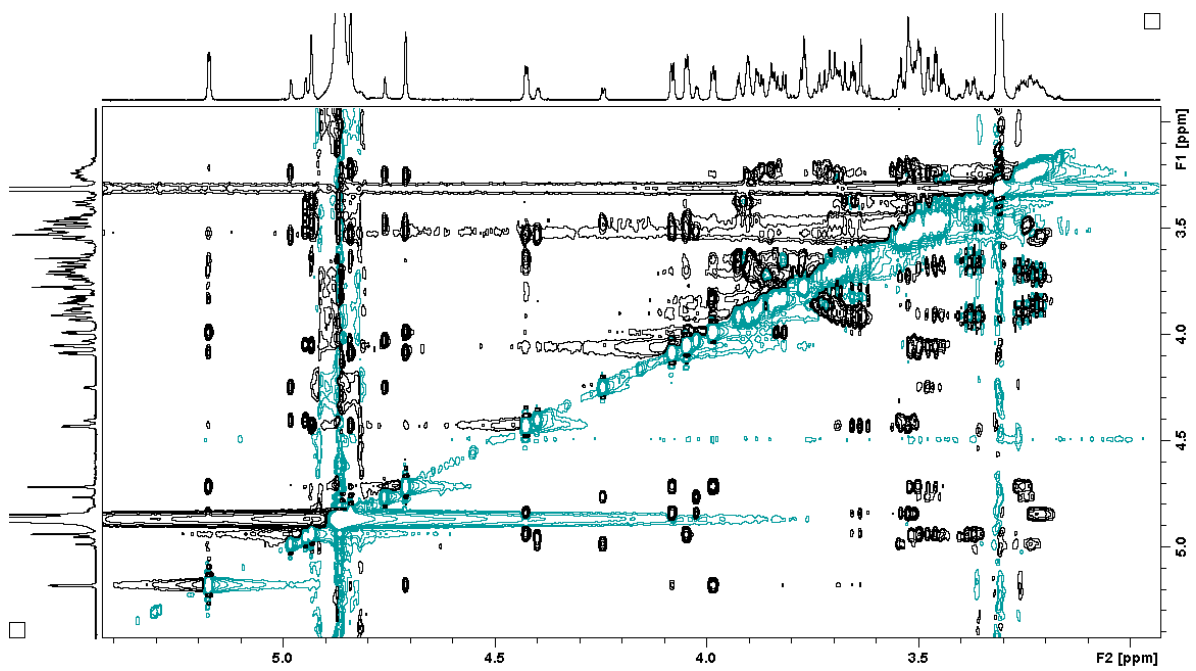

2D-NOESY spectrum of compound **4** in MeOD at 25° with a mixing time of 1 s.

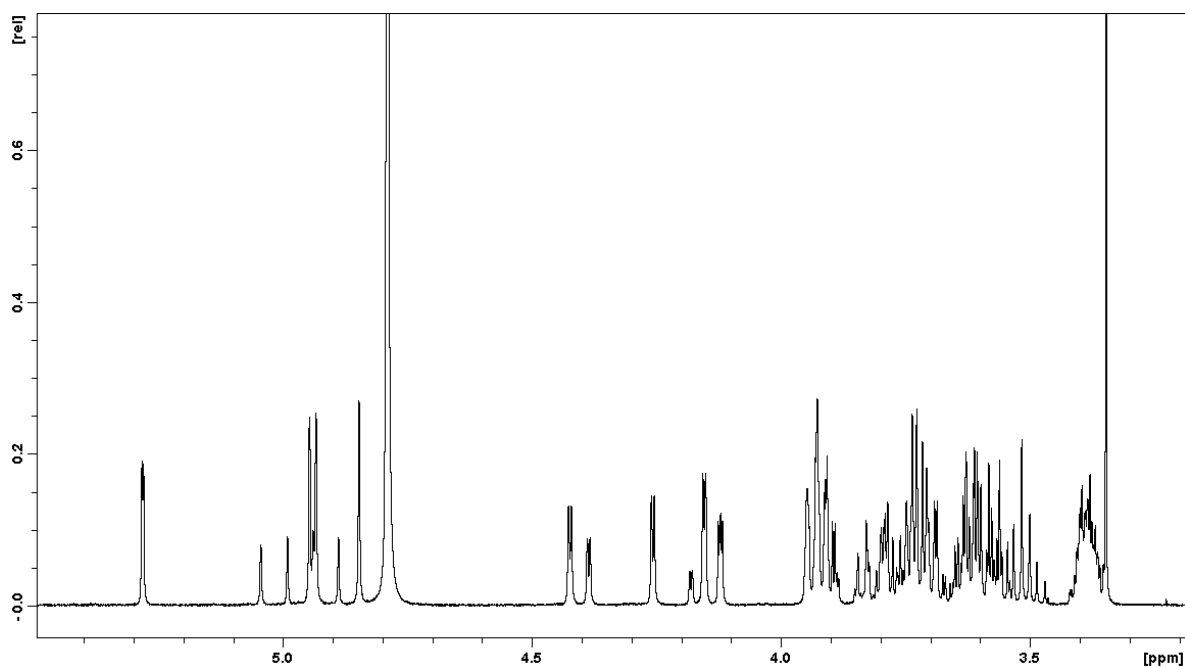

$^1\text{H}$  NMR spectrum of compound **4** in  $\text{D}_2\text{O}$  recorded at 25 °C.

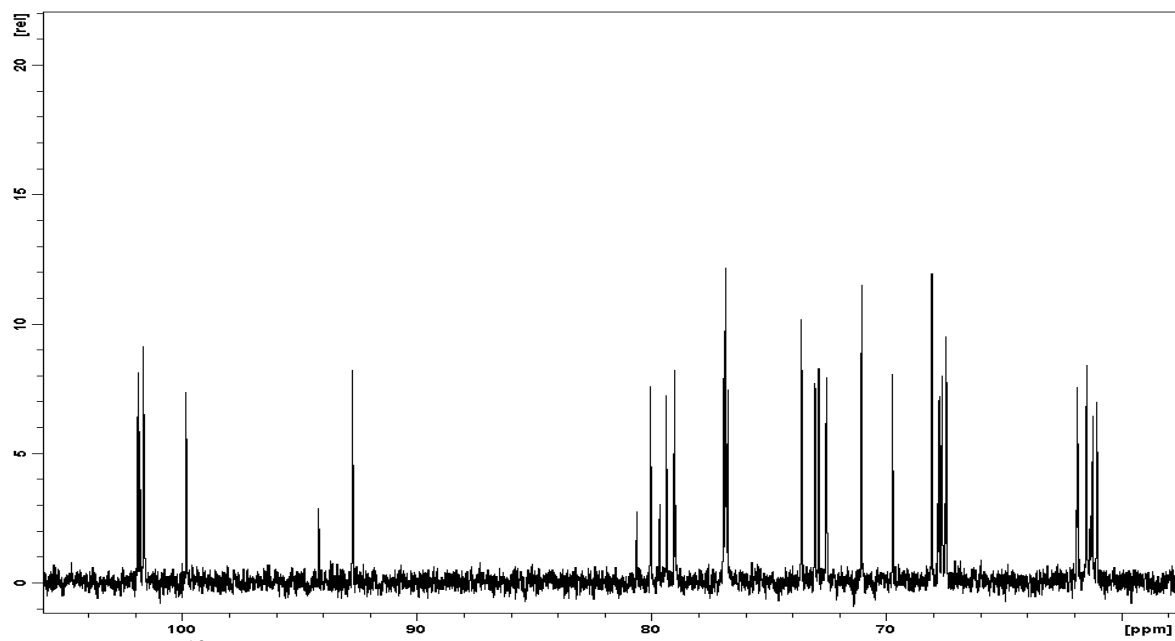

$^{13}\text{C}$  NMR spectrum of compound 4 in  $\text{D}_2\text{O}$  recorded at  $25^\circ\text{C}$ .

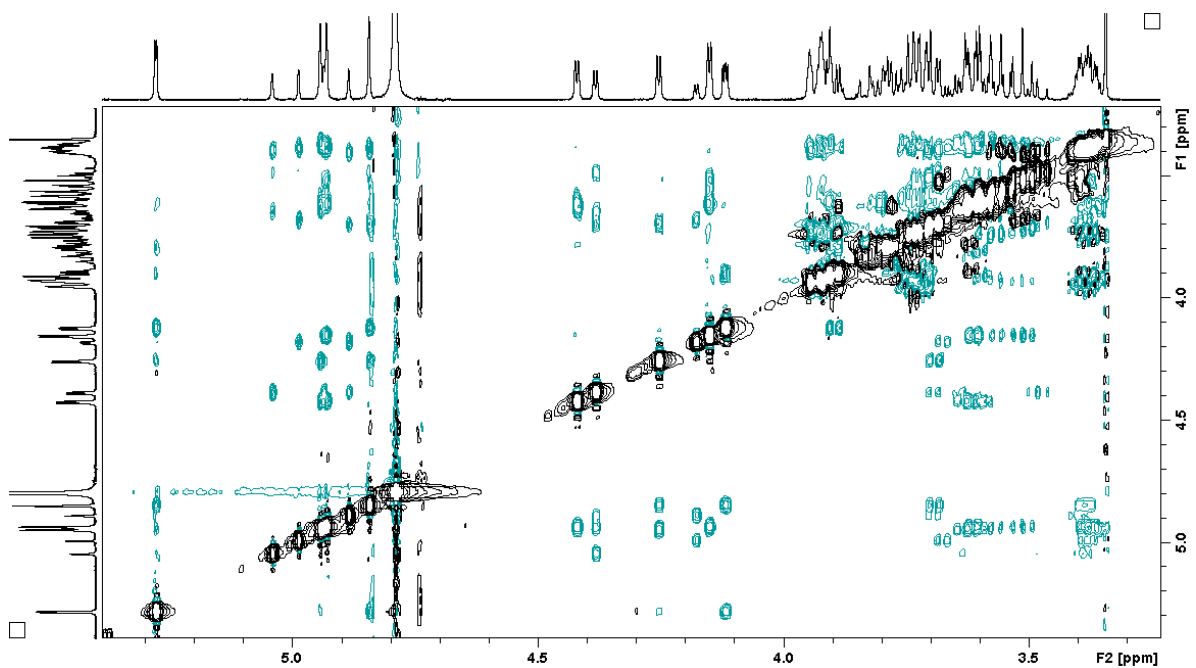

2D-NOESY spectrum of compound 4 in  $\text{D}_2\text{O}$  at  $25^\circ$  with a mixing time of 1 s.

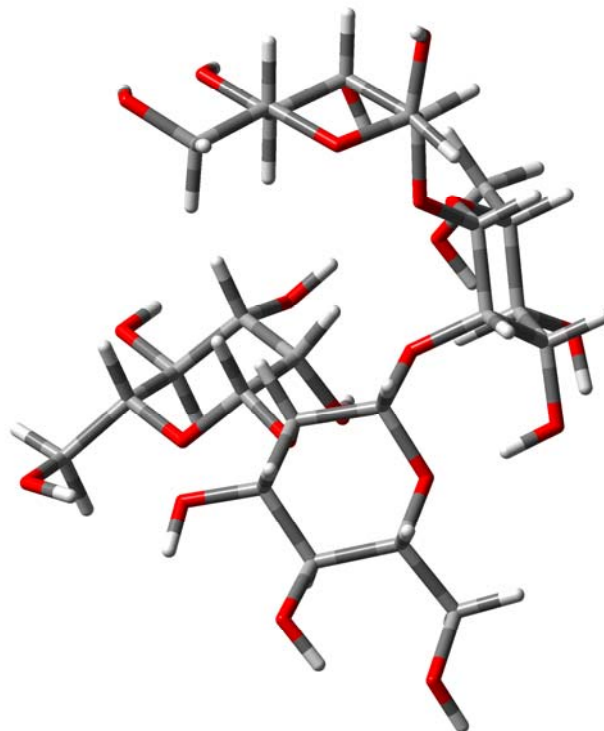

The B3LYP/6-61G(d,p) optimized structure of compound 4.

The optimized structure of compound 4 in Cartesian coordinates:

|   |             |             |             |
|---|-------------|-------------|-------------|
| C | -1.87243600 | -0.98925000 | -0.84852900 |
| C | -2.96225100 | -2.77116000 | -1.98632400 |
| C | -2.95071600 | -3.66590000 | -0.74638500 |
| C | -1.73692600 | -3.31698800 | 0.11668300  |
| H | -3.86005900 | -3.45313500 | -0.16309200 |
| O | -3.01331900 | -1.40208200 | -1.56934600 |
| H | -0.67684200 | -1.56330300 | 0.82179200  |
| H | -0.83273000 | -3.61765400 | -0.43434400 |
| C | -1.67609400 | -1.81143700 | 0.43420900  |
| C | -4.16981000 | -2.95112100 | -2.89877000 |
| O | -2.90785800 | -5.02344400 | -1.15598500 |
| O | -1.86452600 | -4.07183800 | 1.32399000  |
| O | -2.66938300 | -1.48340400 | 1.39287800  |
| O | -2.05735700 | 0.36030200  | -0.54426100 |
| O | 0.03047800  | 1.06787800  | 0.98354400  |
| C | -0.48812400 | 2.03072200  | 0.12882300  |
| C | -1.13682300 | 1.30224100  | -1.05938300 |
| C | -1.84962200 | 2.33152100  | -1.93648700 |

|   |             |             |             |
|---|-------------|-------------|-------------|
| C | -2.87358200 | 3.11078000  | -1.11282100 |
| C | -2.19037200 | 3.75081700  | 0.11031100  |
| C | -3.18532400 | 4.34889600  | 1.10289400  |
| O | -2.44765800 | 1.67836000  | -3.03478700 |
| O | -3.41421400 | 4.09034700  | -1.98728500 |
| O | -1.46529700 | 2.77252400  | 0.86541500  |
| O | -3.95464000 | 5.33726600  | 0.41402400  |
| O | 2.73598200  | 0.76764700  | 0.67902000  |
| C | 2.17881200  | 0.62372600  | 1.93702100  |
| C | 0.91017800  | 1.48598900  | 2.02623700  |
| C | 0.23242600  | 1.24685400  | 3.38896900  |
| C | -0.00482800 | -0.25518300 | 3.57508100  |
| C | 1.31623600  | -1.01773100 | 3.44926500  |
| C | 1.16235500  | -2.53153300 | 3.66025200  |
| O | -0.97415400 | 1.96267800  | 3.55718700  |
| O | -0.56096000 | -0.54266900 | 4.85473300  |
| O | 1.85517900  | -0.75732500 | 2.14173600  |
| O | -0.11791300 | -3.04026400 | 3.29669500  |
| C | 4.80388400  | 1.49283400  | -0.26822400 |
| C | 4.10842900  | 0.36060300  | 0.51104400  |
| C | 4.19683200  | -0.94398900 | -0.28961500 |
| C | 3.65965100  | -0.70837200 | -1.70422100 |
| C | 4.44347700  | 0.41535500  | -2.38886300 |
| C | 3.91529500  | 0.75340700  | -3.78539400 |
| O | 3.54937000  | -2.05427200 | 0.30986200  |
| O | 3.78236600  | -1.89589700 | -2.47824100 |
| O | 4.33169600  | 1.60979000  | -1.59068500 |
| O | 4.22164100  | -0.25845400 | -4.72219700 |
| O | 6.18531700  | 1.22319200  | -0.20355800 |
| H | 0.29771100  | 2.72150800  | -0.22233300 |
| H | -0.34856700 | 0.80816200  | -1.64158700 |
| H | -1.09236600 | 3.05774700  | -2.28454500 |
| H | -3.64375200 | 2.40598200  | -0.76617900 |
| H | -1.50875900 | 4.53953600  | -0.24651800 |
| H | -3.82231600 | 3.53879200  | 1.48459200  |
| H | -2.63735100 | 4.78464200  | 1.94897400  |
| H | -3.03099600 | 2.33402200  | -3.44534100 |
| H | -3.97309700 | 4.67142800  | -1.44578700 |
| H | -4.67269300 | 5.62519600  | 0.99083800  |
| H | 2.88829900  | 0.93222400  | 2.72774400  |
| H | 1.17653300  | 2.54325300  | 1.91040400  |
| H | 0.90968800  | 1.59312500  | 4.18243600  |
| H | -0.68695100 | -0.58803800 | 2.78426700  |
| H | 2.02765200  | -0.64207200 | 4.20328100  |
| H | 1.36680700  | -2.75801100 | 4.71315900  |
| H | 1.90344300  | -3.05352400 | 3.04942800  |

|   |             |             |             |
|---|-------------|-------------|-------------|
| H | -1.42897700 | 1.98749000  | 2.69524400  |
| H | -1.28297000 | 0.09590800  | 4.96785800  |
| H | -0.75552400 | -2.63329200 | 3.90450900  |
| H | 4.55458400  | 2.45705200  | 0.19389400  |
| H | 4.58790400  | 0.24687600  | 1.49014400  |
| H | 5.25712500  | -1.20936900 | -0.36873900 |
| H | 2.60371100  | -0.40177400 | -1.63189500 |
| H | 5.49537700  | 0.11481700  | -2.47864400 |
| H | 2.83234400  | 0.95382900  | -3.72143100 |
| H | 4.39722900  | 1.67443500  | -4.12867500 |
| H | 2.74814200  | -1.73347800 | 0.76048700  |
| H | 3.49026000  | -2.61871400 | -1.90088300 |
| H | 3.93299000  | -1.09910300 | -4.33262400 |
| H | 6.63444600  | 1.89874900  | -0.73102600 |
| O | -4.12009300 | -2.03490600 | -3.97581600 |
| H | -0.97230200 | -1.12569600 | -1.47686100 |
| H | -2.04632300 | -2.94818700 | -2.57498200 |
| H | -4.16947100 | -3.96176500 | -3.31422500 |
| H | -5.08611500 | -2.82679200 | -2.29803400 |
| H | -2.75776100 | -5.53974300 | -0.35088000 |
| H | -1.07657300 | -3.91377900 | 1.87846000  |
| H | -2.81296300 | -2.31223700 | 1.87973800  |
| H | -3.91003300 | -1.17503000 | -3.57864700 |
